# Supplementary material for: Verification of AKT and CDK5 Gene and RNA Interference Combined with Irradiation to Mediate Fertility Changes in Plutella xylostella (Linnaeus)
Source: MDPI journal article supplement (doi:10.3390/ijms25094623), 2024-04-24
Supplement: s1 [file s1]

Table S1. Primers sequence used in this experiment.

| Use of primers | Gene                                 | Primer sequence (5'-3')                                                                     |
|----------------|--------------------------------------|---------------------------------------------------------------------------------------------|
| qPCR primer    | <i>PxPI3K</i>                        | F: CACGCCTCAGCAGCACATCG<br>R: CTCCTCTTGACCGCACACCTTG                                        |
|                | <i>PxJAK2</i>                        | F: GCCGCCAGATTACGAGAGGATTG<br>R: GGAAGCCGACGATTCAATGAGAGG                                   |
|                | <i>PxmTOR</i>                        | F: CGACACAAGGACAGCGTCATGG<br>R: GTAGAGGCGAGGTGGAGGGTTC                                      |
|                | <i>PxPTEN</i>                        | F: GAGACTGACCTGGCTGAAGACAAC<br>R: TGTGTTCCGTGGGCGTTTGAG                                     |
|                | <i>PxAKT</i>                         | F: GCCGAACCACCAAGACCTTCTG<br>R: GCCGCAGCACATCTCGTACAG                                       |
|                | <i>PxPDK</i>                         | F: CACTGCCCAAGACTACATT<br>R: CCTCCTTTTCTCGTTTTAT                                            |
|                | <i>PxCdk5</i>                        | F: CATGTGGTCCGCTGGCTGTATC<br>R: CGGCTTGTAGTCAGGCAGTTGG                                      |
|                | <i>PxNfkb</i>                        | F: GAGCATCACGGAGCAGCCATG<br>R: GGTATGTCTTGGTGCGGTTACTGG                                     |
|                | <i>PxIKK<math>\alpha</math></i>      | F: ACTGCTGGAGAAATGGTT<br>R: ATCACTTTGCTTGCTCT                                               |
|                | T7 - <i>PxPI3K</i>                   | F: TAATACGACTCACTATAGGGGCCGGCTGGTCGAGGTGGTA<br>R: TAATACGACTCACTATAGGGCAAAGTCTTTGCTCAGTCGC  |
|                | T7 - <i>PxJAK2</i>                   | F: TAATACGACTCACTATAGGGGAACGAAGCGACCATCACACT<br>R: TAATACGACTCACTATAGGGTTTGGACAAGGTGGATCGGG |
|                | T7 - <i>PxmTOR</i>                   | F: TAATACGACTCACTATAGGGACACGAGGACTTGCGACAAG<br>R: TAATACGACTCACTATAGGGGGGATCTTCTCGGGGAACCTT |
|                | T7 - <i>PxPTEN</i>                   | F: TAATACGACTCACTATAGGGTGGTGCTGAGCCCCGCGCCC<br>R: TAATACGACTCACTATAGGGAGGGGCGCTCACCCGAGTCC  |
| dsRNA primer   | T7 - <i>PxAKT</i>                    | F: TAATACGACTCACTATAGGGGCGGGTGGAGGCGCCCGGGT<br>R: TAATACGACTCACTATAGGGCATGGCATAAGCTTGCCCCG  |
|                | T7 - <i>PxNfkb</i>                   | F: TAATACGACTCACTATAGGGATGGCTGATGTGGAATGCGA<br>R: TAATACGACTCACTATAGGGTAGCTCTGGGAGGTACGCTG  |
|                | T7 - <i>PxCdk5</i>                   | F: TAATACGACTCACTATAGGGTGAAGAAATACTTTGATAGT<br>R: TAATACGACTCACTATAGGGTGCCATGGCATCGTCAGCTG  |
|                | T7 - <i>PxPDK1</i>                   | F: TAATACGACTCACTATAGGGCACCATCCCCAACAAGTCCA<br>R: TAATACGACTCACTATAGGGACGGTGGAAGACCCGAAATC  |
|                | T7 - <i>PxIKK<math>\alpha</math></i> | F: TAATACGACTCACTATAGGGAGAACCGATGAAAACTCGC<br>R: TAATACGACTCACTATAGGGTTCTCATGTGCCTTCTTTTT   |
